# Supplementary material
Source: publisher figshare collection journal article supplement (https://geolsoc.figshare.com/ndownloader/files/30879968)
Supplement: Supplementary file 1 [file 30879968]

## Sheet: Standards
Table S3
Labels	Site	U	Th	Th/U	comm		238U/206Pb			207Pb/206Pb			238U/206Pb			207Pb/206Pb			206Pb/238U
		ppm	ppm		f206%		ratio (unc)			ratio (unc)			ratio (204corr)			ratio (204corr)			date (Ma, 207corr)
Standards with sample 17TT07 and 17TT12 from 26/10/2018
SL13-4.1		237	20.619	0.087	0	12.18	±	0.1426	0.0585	±	0.0018	12.1753	±	0.1384	0.0585	±	0.0018	508.3	±	5.558
TEM-18.1		442	161.772	0.366	0.05	15.04	±	0.2674	0.0555	±	0.0016	15.0416	±	0.2675	0.0532	±	0.0047	414.8	±	4.016
TEM-19.1		384	223.488	0.582	0.23	16.37	±	0.3911	0.0563	±	0.0023	16.5883	±	0.3964	0.0417	±	0.0084	381.5	±	5.209
TEM-20.1A		400	255.6	0.639	0.05	14.86	±	0.2744	0.0556	±	0.0017	14.8673	±	0.2745	0.0531	±	0.0029	419.6	±	4.236
TEM-21.1		411	191.115	0.465	0.08	14.97	±	0.2888	0.0559	±	0.0017	14.9388	±	0.2881	0.0559	±	0.0017	416.5	±	4.371
TEM-22.1		130	47.32	0.364	0.09	14.84	±	0.4644	0.056	±	0.0028	14.8513	±	0.4648	0.0532	±	0.0051	420.1	±	7.202
TEM-22.2		172	53.492	0.311	-0.05	14.91	±	0.4181	0.0547	±	0.0025	14.9169	±	0.4182	0.0524	±	0.0042	418.6	±	6.412
TEM-23.1		420	110.04	0.262	0.13	15.32	±	0.3303	0.056	±	0.0017	15.3113	±	0.3301	0.0544	±	0.0026	407.2	±	4.255
TEM-24.1		230	100.51	0.437	-0.17	14.75	±	0.3755	0.0537	±	0.0021	14.7838	±	0.3764	0.0493	±	0.0047	423.6	±	5.703
TEM-25.1		728	269.36	0.37	-0.06	15.45	±	0.4577	0.0543	±	0.0014	15.462	±	0.458	0.0515	±	0.0026	404.5	±	5.288
Standards with sample 17TT10a and 17TT10b from 17/11/2019
SL13-2		238	19.754	0.083	0	10.91	±	0.1106	0.0583	±	0.0016	10.9059	±	0.1378	0.0583	±	0.0016	565.9	±	6.848
TEM-2.1		220	64.9	0.295	0.08	15.59	±	0.301	0.0555	±	0.0019	15.5739	±	0.3007	0.0555	±	0.0019	400.5	±	4.837
TEM-2.2		236	52.628	0.223	-0.03	14.62	±	0.2972	0.0551	±	0.0018	14.612	±	0.2969	0.0551	±	0.0018	426.5	±	4.979
TEM-3.1		132	69.564	0.527	-0.16	14.8	±	0.3666	0.0538	±	0.0023	14.7833	±	0.3663	0.0538	±	0.0023	422.3	±	6.412
TEM-4.1		75	22.575	0.301	-0.22	14.57	±	0.5153	0.0534	±	0.0032	14.5825	±	0.5157	0.052	±	0.0051	428.8	±	8.882
TEM-1.1		88	22.176	0.252	0.06	16.32	±	0.4475	0.0547	±	0.0029	16.4462	±	0.4509	0.0468	±	0.0081	383.2	±	6.865
TEM-6.1		144	66.528	0.462	0.11	15.59	±	0.4112	0.0558	±	0.0024	15.5764	±	0.4108	0.0558	±	0.0024	400.4	±	6.006
TEM-5.1		311	151.146	0.486	0.02	14.98	±	0.3321	0.0553	±	0.0015	14.9726	±	0.3318	0.0553	±	0.0015	416.4	±	4.466
TEM-3.2		174	91.002	0.523	0.08	15.19	±	0.3425	0.0557	±	0.0022	15.1778	±	0.3422	0.0557	±	0.0022	410.7	±	5.752
TEM-4.2		136	62.696	0.461	0.07	14.82	±	0.3752	0.0558	±	0.0025	14.8464	±	0.3758	0.0536	±	0.0041	420.6	±	6.603
TEM-2.3		252	118.44	0.47	0.04	15.16	±	0.2786	0.0553	±	0.0018	15.1733	±	0.2789	0.0536	±	0.0028	411.7	±	4.728
TEM-8.1		270	114.21	0.423	0.16	16.04	±	2.8369	0.0559	±	0.0018	16.0585	±	2.8397	0.0543	±	0.0027	389.2	±	15.167
TEM-8.2		332	146.744	0.442	0.1	15.47	±	1.2279	0.0557	±	0.0015	15.4602	±	1.2269	0.0557	±	0.0015	403.3	±	8.312
TEM-9.1		93	26.226	0.282	0.12	15.58	±	0.4439	0.0558	±	0.0028	15.6003	±	0.4446	0.0536	±	0.0048	400.7	±	7.16
TEM-10.1		259	120.435	0.465	0.02	14.99	±	0.2509	0.0553	±	0.0017	14.9932	±	0.251	0.0542	±	0.0023	416.3	±	4.358
All analytical errors are given at 1σ
* corrected for common Pb using measured 204Pb and Cumming and Richards (1975) common Pb composition for likely age of rock
** corrected for common Pb using the '207' method of Compston et al. (1984)
f206% is the amount of 206Pb modelled as non-radiogenic, based on measured 204Pb
